# Supplementary material for: Design and Implementation of a Micromechanical Silicon Resonant Accelerometer
Source: MDPI journal article supplement (doi:10.3390/s131115785), 2013-11-19

*Note:*

On p. 15791, Figure 6b appears distorted due to conversion from Word to PDF: dislocation between the figure and its annotations. The correct picture is shown as follows:

**Figure 6.** (a) The diagram of the accelerometer equipped with the common DETF structure; (b) The diagram of the accelerometer equipped with the improved DETF structure.

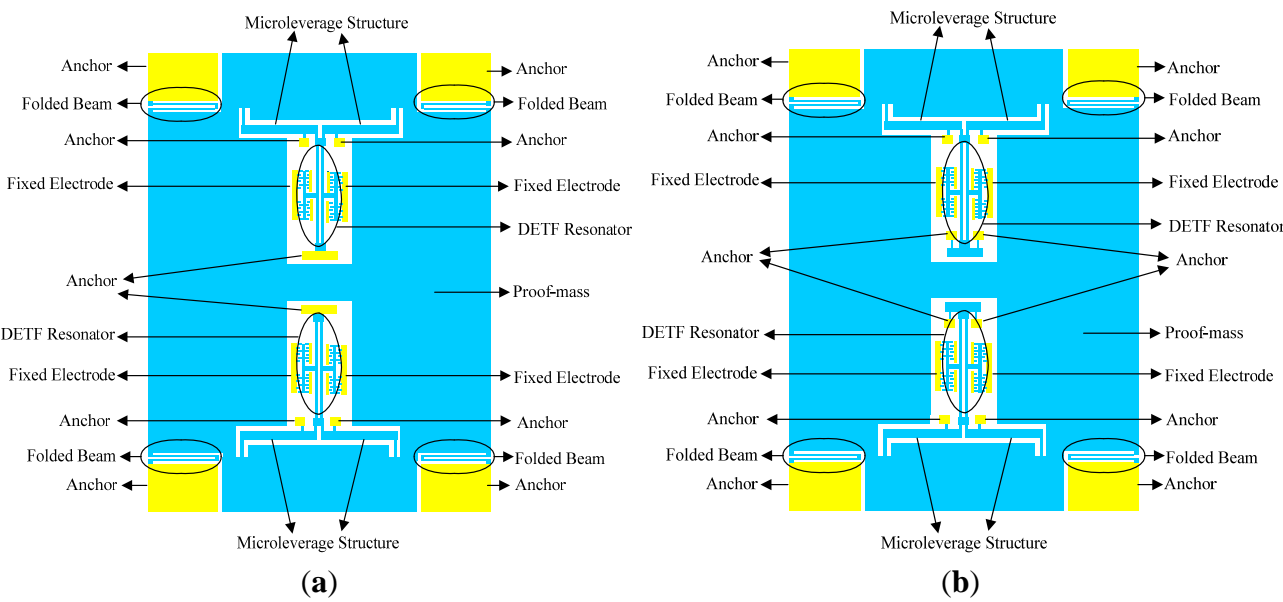

Supplement: s1 [file s1]
